# Supplementary material
Source: Research Square preprint supplement (doi:10.21203/rs.3.rs-9676083/v1)
Supplement: Supplementary file 1 [file cc7e5aa0efd56e3878db0183.docx]

Supplements

**Fig. S1 Composite fields of FLWV500m at initiation (0 h) for each LS-MCS orientation.**

**Fig. S2 (a, c) Sea level pressure at the time of LS-MCS initiation, and (b, d) accumulated precipitation. (a, b) correspond to the event from 13:00 UTC 4 August to 01:00 UTC 5 August 1986, and (c, d) correspond to the event from 02:00 UTC 28 August to 11:00 UTC 28 August 1967 (Uetsu heavy rainfall).**

**Fig. S3 Example of the analysis procedure using the same LS-MCS event as shown in Fig. 1b. (a) Spatial distribution of the number of satisfied conditions among the 6-conditions for LS-MCS occurrence (color shading), horizontal wind at 950 hPa (vectors), and detected LS-MCS area (red contour). (b) Same as (a), but the environmental fields are centered on the LS-MCS area and rotated to align orientation. All fields are shown at the time of LS-MCS initiation. The black box indicates the upstream domain. In this case, the area fraction satisfying all 6-conditions (class 6) within the upstream domain is 9.13%.**

**Fig. S4 Same as Fig. 5c and 5e, but for all variables comprising the 6-conditions.**

**Fig. S5 (a) Same as Fig.5a, but with the dLFC threshold relaxed from ≤1.0 km to ≤1.5 km. (b) Same as Fig. S4a, but with the dLFC threshold relaxed from ≤1.0 km to ≤1.5 km.**

**Fig. S6** Left panel: Box-and-violin plots showing event-mean rainfall intensity with class = 6 and class < 6 at the time of LS-MCS **initiation**. Right panel: Same as Fig. 6.

**Fig. S7 (a, b) Same as Fig. 7g and 7h. (c) Accumulated precipitation for a representative northwest–southeast-oriented event from 15:00 UTC 17 July to 20:00 UTC 17 July 2013. (d) IWVF (color shading and vectors) and Z850 (m) at the time of LS-MCS initiation (15:00 UTC 17 July 2013) for the same event as in (c).**

Table S1: Percentage of cases where a tropical cyclone center is located within the region of 30–45°N and 130–145°E at the time of LS-MCS initiation. The tropical cyclone center is defined as the minimum sea level pressure point in RRJ-Conv nearest to the center coordinates recorded in the JMA best-track data.

| S-N | 43.8% (42/96) |
| --- | --- |
| SW-NE | 14.2% (18/127) |
| W-E | 12.0% (12/108) |
| NW-SE | 10.0% (3/30) |
